# Supplementary material
Source: publisher figshare collection journal article supplement (https://acs.figshare.com/ndownloader/files/18657308)
Supplement: Supplementary file 1 [file 18657308]

# Transforming the Accuracy and Numerical Stability of ReaxFF Reactive Force Fields

David Furman<sup>\*,†,‡</sup> and David J. Wales<sup>\*,†</sup>

E-mail: df398@cam.ac.uk; dw34@cam.ac.uk

## Supporting Information

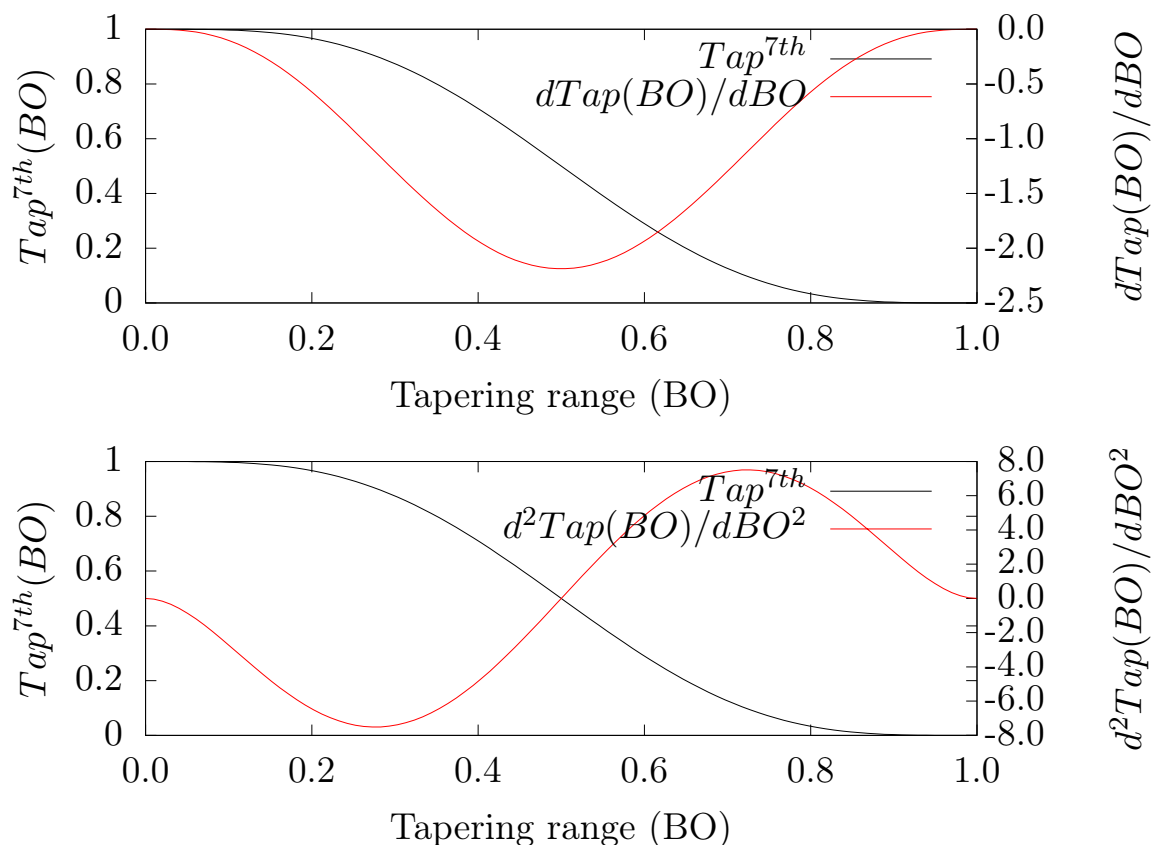

**Figure S1.**  $7^{th}$  degree tapering polynomial and its  $1^{st}$  (top panel) and  $2^{nd}$  (bottom panel) derivatives. The tapering range is arbitrarily chosen as  $x_r = x_{\max} - x_{\min} = 1.0$ , where  $x_{\max}$  and  $x_{\min}$  are the upper and lower bond order cutoffs, respectively.

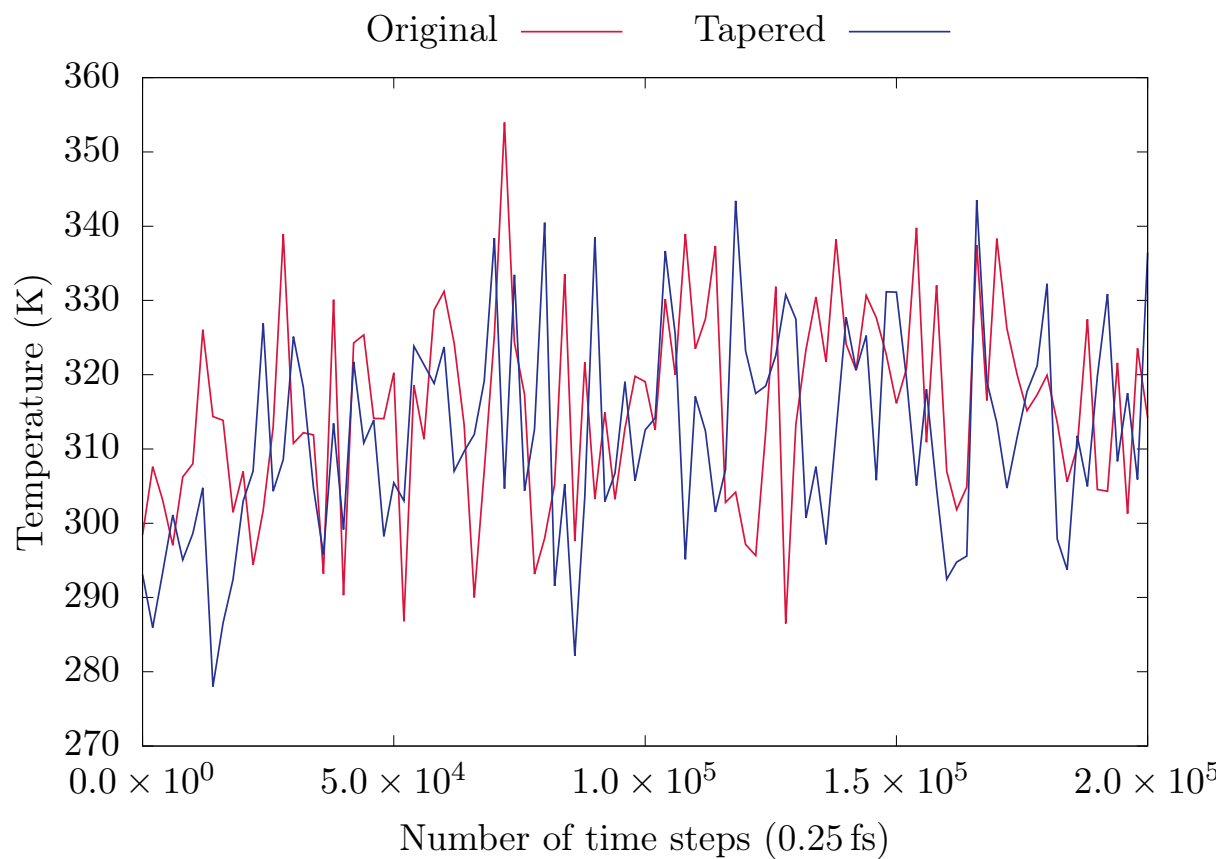

**Figure S2.** Evolution of temperature for the trpzip2 peptide in the NVE ensemble of a pre-equilibrated system (300 K) for the original and tapered ReaxFF formulations.

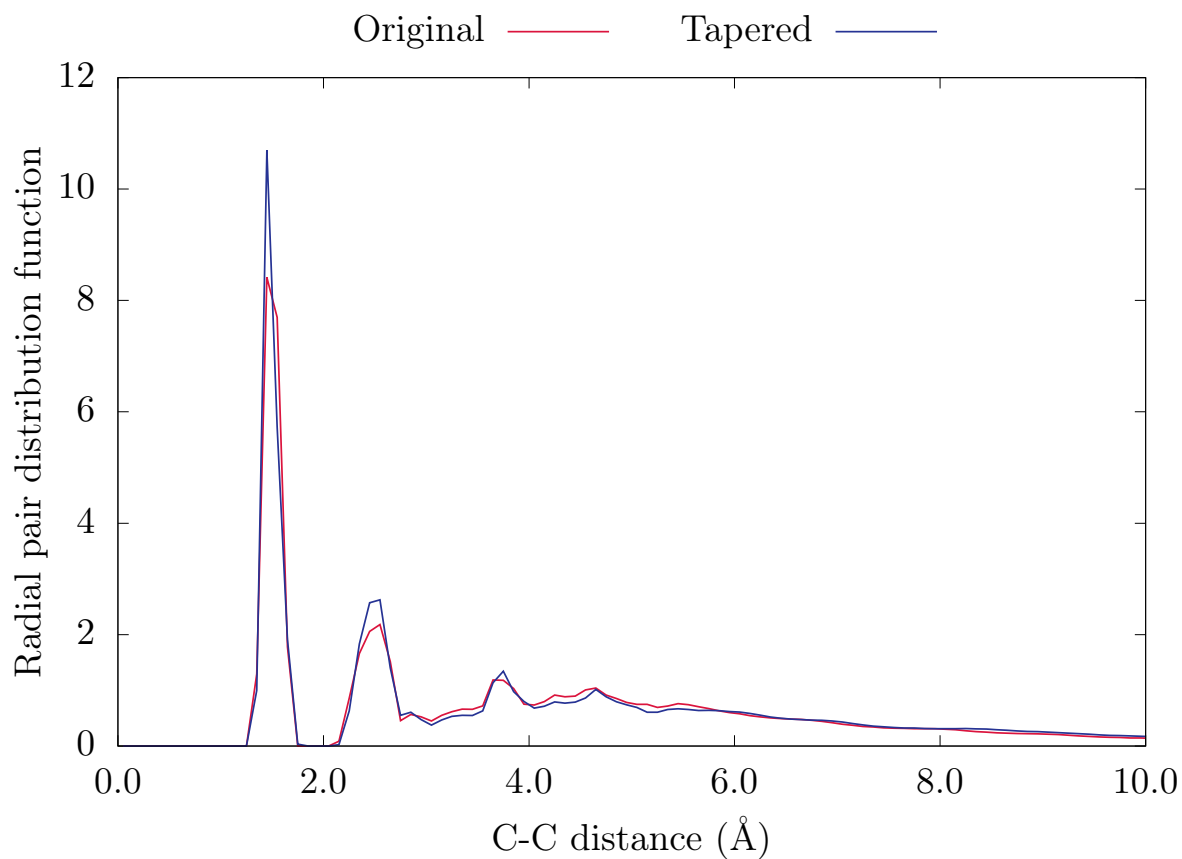

**Figure S3.** Radial pair distribution function of carbon atoms in the trpzip2 peptide (calculated in the NVE trajectory) for the original and tapered ReaxFF formulations.

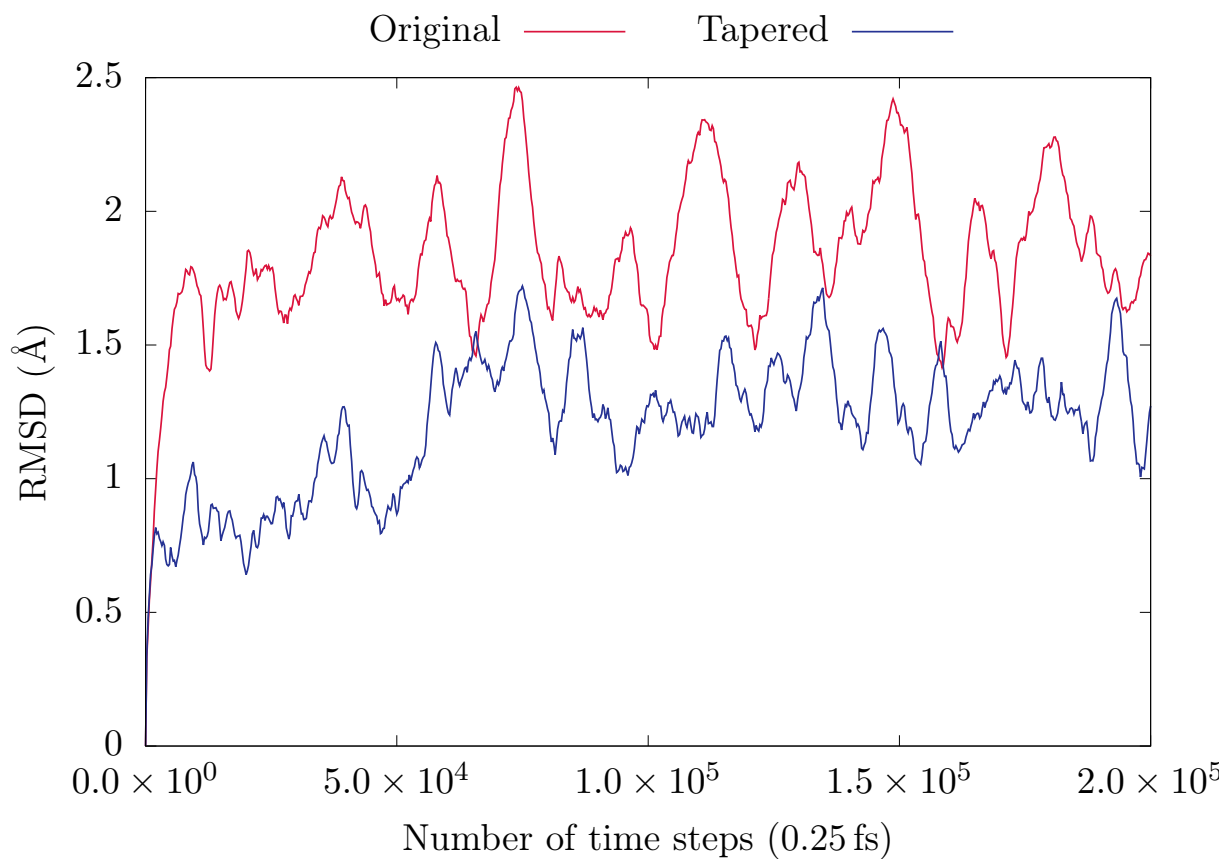

**Figure S4.** Root mean square displacement (RMSD) for all atoms in the trpzip2 peptide (calculated in the NVE trajectory) for the original and tapered ReaxFF formulations.

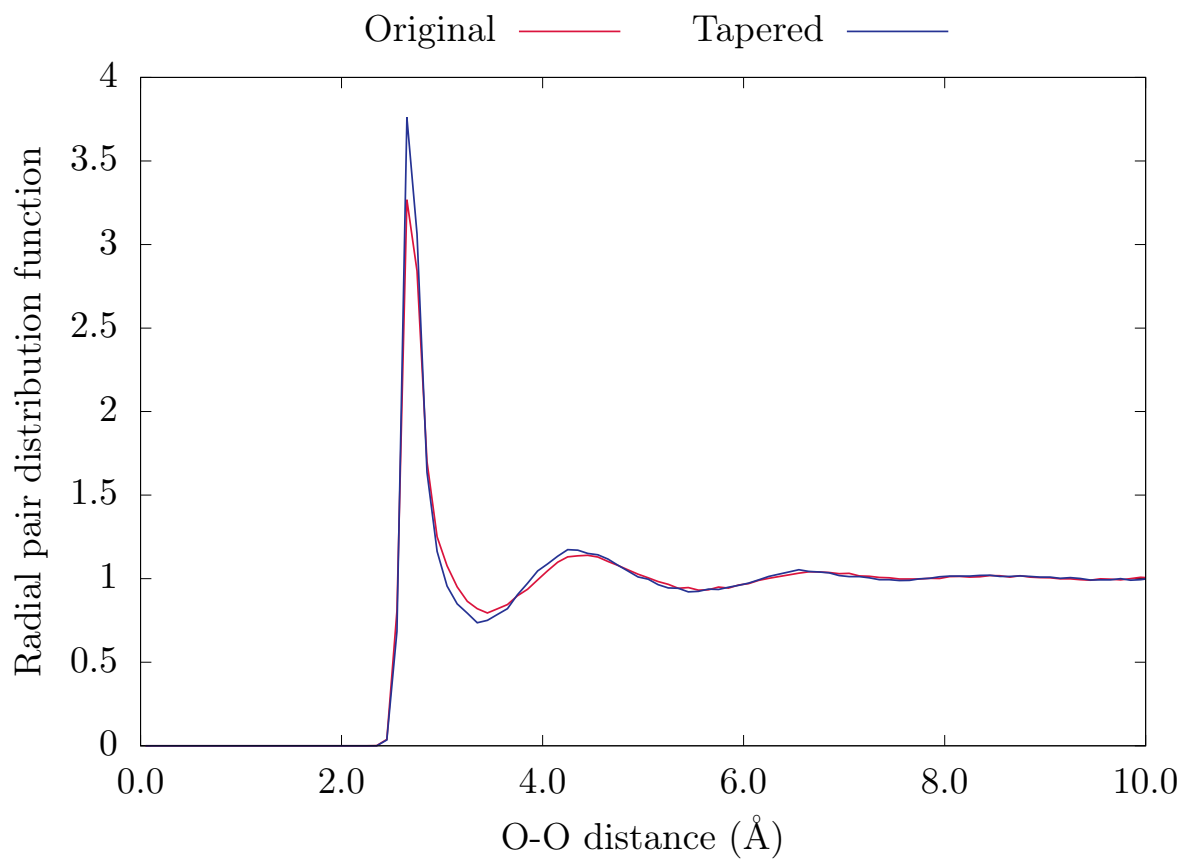

**Figure S5.** Radial pair distribution function of oxygen atoms in the bulk liquid water system (calculated in the NVE trajectory) for the original and tapered ReaxFF formulations.
